# Supplementary material
Source: PubMed Central journal article supplement (PMC3436512)
Supplement: supp_M112.351379_jbc.M112.351379-1.pdf [file supp_M112.351379_jbc.M112.351379-1.pdf]

## Supplementary Figure 1

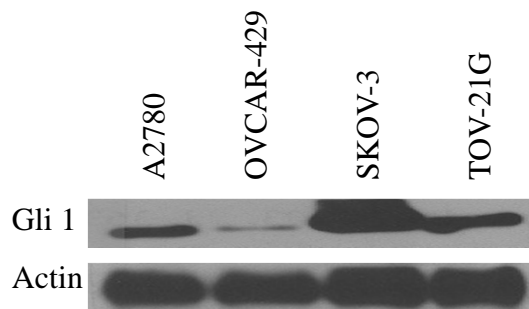

**Supplementary figure 1:** Representative blots of Gli1 from lysates collected from A2780, OVCAR-429, SKOV-3 and TOV-21G cells grown under adherent culture conditions for 24 hours without any other treatment. Actin was used as a loading control.
